# Supplementary material for: Magnetoelectric Properties of Multiferroic Composites Based on BaTiO3 and Nickel-Zinc Ferrite Material
Source: MDPI journal article supplement (doi:10.3390/ma17081905), 2024-04-19
Supplement: s1 [file s1]

## Supplementary Materials

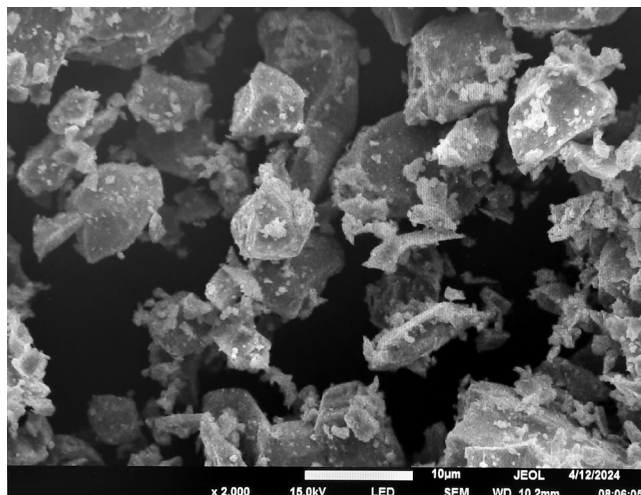

**Figure S1** SEM image of the raw BT material powder used in the experiment.

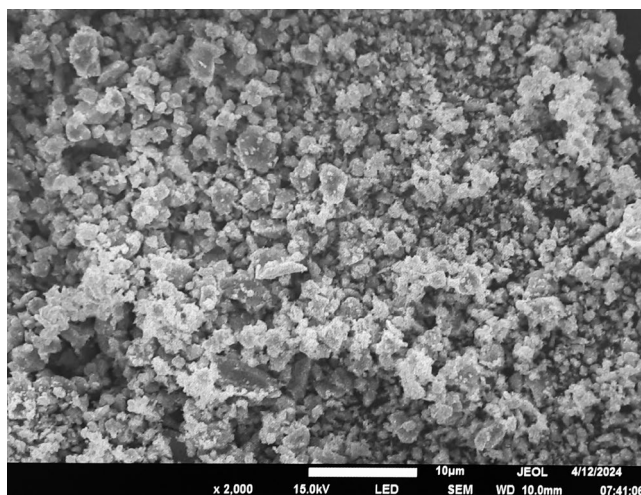

**Figure S2** SEM image of the raw  $\text{Ni}_{0.64}\text{Zn}_{0.36}\text{Fe}_2\text{O}_4$  (ferrite) material powder used in the experiment.
